# Supplementary material for: Multiple waves of recent DNA transposon activity in the bat, Myotis lucifugus
Source: HighWire-hosted journal article supplement (doi:10.1101/gr.071886.107), 2008-03-13
Supplement: Ray_et_al_Myotis_transposons_Supplemental_Figure.pdf [file Ray_et_al_Myotis_transposons_Supplemental_Figure.pdf]

### Supplemental Figure

Supplemental Figure S1. Representative alignments for three subfamilies recovered during this analysis: A) a nonautonomous piggyBac1\_ML element; B) a nonautonomous hAT1\_ML element; C) a non-autonomous Tc2 element. For all, the presumed TSD is outlined in black and the TSDs that are characteristic of the family are shaded in gray. Identical residues below the consensus are indicated by “.” and indels are indicated by “-”.

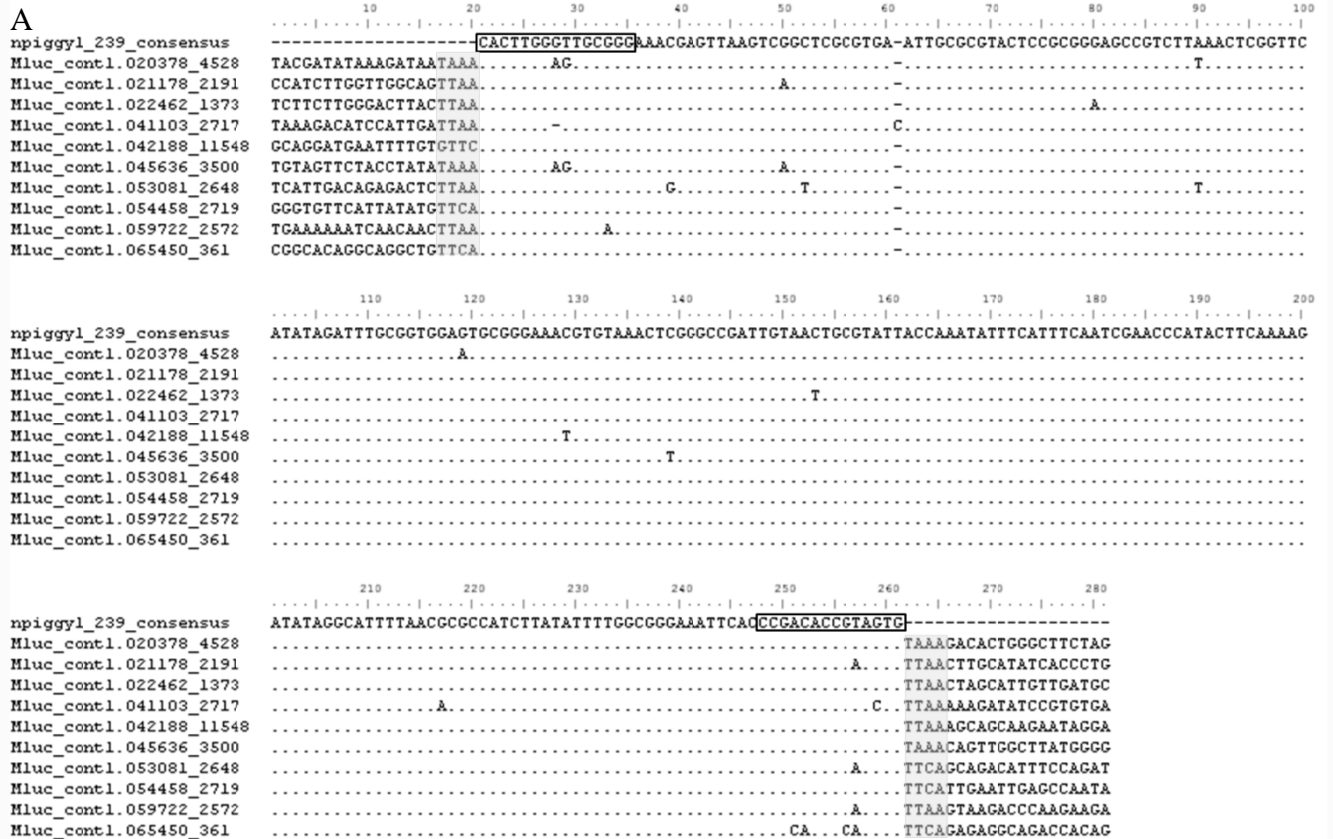

**B**

```

      10      20      30      40      50      60      70      80      90     100
nhAT1_239a_consensus -----CAGTCATGGCGAACCTATGACACGGCTGTCAGAGGTGACACGGCAA-CTCATTITTTT---GGTTGATITTTCTT---T
Mluc_cont1.000608_2072 TCTAATACCTGATCCTAAGT.....A.....C---
Mluc_cont1.001009_6307 CTTTACGCTCAAGCTCTAGGC.....T.....T.....T---
Mluc_cont1.005237_1270 AACACCCACCTTCCACTAGAA.....A.....A.....T---G---
Mluc_cont1.014030_9544 TGCCTAGTGACATCATAGCC.....C.....T.....TTT---
Mluc_cont1.046453_18410 TTCTTCTTTTACTCTAGTG.....A.....A.....---A---
Mluc_cont1.083381_63   CAAAATTAGATGCTCTATAG.....G.....A.....T---
Mluc_cont1.094254_1495 TTGAGAACCCTCGCTAGGG.....G.....A.....G---
Mluc_cont1.104958_1817 AGTAAGGCTGAACTAGAG.....A.....C.....T---T---TGAT
Mluc_cont1.115850_12906 TATTCGCCAACTCCCTAAAT.....T.....T..A..A---.C---
Mluc_cont1.132846_1554 CTGATCAACTCAGTCTGCC.....G.....T.....G---

      110     120     130     140     150     160     170     180     190     200
nhAT1_239a_consensus GTTAAATGCC---ATTTAAATATATAAAATAAATATCAAAAA-TATA---ADTCTTTGTTTTACTATGG---TTGCAAATATCAAAAAATTT-CTA
Mluc_cont1.000608_2072 .....T---
Mluc_cont1.001009_6307 .....AGTA.....
Mluc_cont1.005237_1270 .....TAAAA..AT.....
Mluc_cont1.014030_9544 .....C---A..CT..
Mluc_cont1.046453_18410 .....ATTC.....C---
Mluc_cont1.083381_63   .....A.....A.....T..
Mluc_cont1.094254_1495 .....
Mluc_cont1.104958_1817 T..CTT.....
Mluc_cont1.115850_12906 .....T.....G---
Mluc_cont1.132846_1554 .....T.....C---

      210     220     230     240     250     260     270     280     290     300
nhAT1_239a_consensus -TATGTGACACGGCACCCAGAC---TTAAGTTAGGG-TTTTT-CAAAA--TGCTGACACGGCC-GAGCTC-AAAGGTTCCG-CCATCACTG
Mluc_cont1.000608_2072 .....TTAAC...-T.....T.....TCCTAAGTC
Mluc_cont1.001009_6307 .....T.....T.....GTCTAGGCT
Mluc_cont1.005237_1270 .....A.....-T.....CAGTAGAAT
Mluc_cont1.014030_9544 .....G.....T.....C---TCGTAGCCT
Mluc_cont1.046453_18410 .....TT.....G.....GTCTAGTGA
Mluc_cont1.083381_63   .....T.....T.....GTCTATAGC
Mluc_cont1.094254_1495 .....A-GAC.....A.....GCCTAGGCC
Mluc_cont1.104958_1817 .....TTCTAGAGT
Mluc_cont1.115850_12906 A.....AG..G.....A.C.C.CC.....GA.....C.....CT.....GGCCTAAAT
Mluc_cont1.132846_1554 .....TCAAG...A..A.-..C---.C---A..A-.....GCCCTAGAC

      310
nhAT1_239a_consensus -----
Mluc_cont1.000608_2072 ATCAAGGATGG
Mluc_cont1.001009_6307 CAGATGTGCAG
Mluc_cont1.005237_1270 GTCTTCCTCAG
Mluc_cont1.014030_9544 CTGATCTACTC
Mluc_cont1.046453_18410 CATGGCTGAGC
Mluc_cont1.083381_63   CTCCTAAACAC
Mluc_cont1.094254_1495 ATCCTGTCCAA
Mluc_cont1.104958_1817 GTGTCCTGCTC
Mluc_cont1.115850_12906 TATCAAATTAC
Mluc_cont1.132846_1554 ACTCGCITTGG

```

C

```

10 20 30 40 50 60 70 80 90 100
nTc2_527_consensus -----CCGTATTTTCCCTGTATAAGACGCTA-----TTTTTTCTAAAATCGTTAGACTGAAAATCGAGGGCGCTTATACAG
Mluc_cont1.087472_2447 TCGTATTATCTGCTGAATTA.A.....A.....A.....TTTT.....A.....A.....A.....T.....C.....GA
Mluc_cont1.111057_5805 CCCAAGCCCAAGCAGATTTA.....A.....A.....C.....C.....T.....A.....A.....A.....
Mluc_cont1.018722_481 GCTCTCTTAATCACTAAGTA.....T.....A.....T.....CT.....T.....TT.....
Mluc_cont1.060466_101 CTGTTAACTTTTCTTTATA.....T.....T.....A.....T.....A.....T.....A.....T.....A.....
Mluc_cont1.020727_688 TTCTTTTATTGCTGTGATA.....T.....A.....T.....CT.....A.....G.C.A.A.....
Mluc_cont1.215841_1303 AGCGGGGAAAAGGGACATA.....A.....A.....T.....C.....A.....A.....A.....A.....A.....
Mluc_cont1.286269_519 TAAGACCTTCACGGACATA.....C.....A.....AA.....A.....A.....A.....A.....AC.C.....T
Mluc_cont1.061271_2901 TTAGCATTGAAGACAACTA.T.....T.....C.T.....C.....C.....A.....A.....A.....
Mluc_cont1.232421_7894 ATAGTAGAATTATATAGTA.A.....A.....A.....TT.....A.....A.....TC.....A.....
Mluc_cont1.288193_1284 ACTTCAGAAATCACAACTA.....C.....T.....C.....A.....T.....T.....

110 120 130 140 150 160 170 180 190 200
nTc2_527_consensus -----GAACTACCGGAGGGAGCCGGCCG--GGTCCGCTAGCTGCCATACCTTCTCAAAAGCGCTTCTCCGATCAGGAGCCTTATTGTACTAGAGTCAGC
Mluc_cont1.087472_2447 .....G.....T.....AT.T.--.....A.....T.....G.....T.....C.....T.....C.....
Mluc_cont1.111057_5805 .....T.....T.....T.....T.....T.....A.....C.....CA.TC.G.
Mluc_cont1.018722_481 .....TA.....A.....C.C.C.TA.....G.....G.....T.....T.....A.....
Mluc_cont1.060466_101 .....AGA.....T.....AG.--C.A.....G.....T.....G.....T.....
Mluc_cont1.020727_688 .....A.....T.....A.....C.....C.....T.....T.....
Mluc_cont1.215841_1303 .....G.....T.....T.A.A--.A.A.....A.....A.....G.A.....
Mluc_cont1.286269_519 .....T.....A.....T.T.T.--.....T.....C.....A.....A.....T.....
Mluc_cont1.061271_2901 .....T.....A.A.....T.AG.A.--.....T.....C.....G.T.....
Mluc_cont1.232421_7894 .....A.....T.....AA.T.--.A.A.....T.....A.....
Mluc_cont1.288193_1284 .....T.....T.....T.T.--.....G.....A.....T.....C.....G.....

210 220 230 240 250 260 270 280 290 300
nTc2_527_consensus -----TGATGCCGTAAAT-----TGGAGGTGGAGCTGGACATGCCAGATGCCAA-CAGGACCCGAGCCTTCTGAGCCATAAAGATCTCAAAAAAT-AAAAAG
Mluc_cont1.087472_2447 .....C.....T.....T.....A.....T.....T.....A.....A.....A.....A.....A.....
Mluc_cont1.111057_5805 .....A.C.....A.....A.....A.....G.....T.....G.....A.....A.....A.....
Mluc_cont1.018722_481 .....C.....C.....A.....A.....A.....A.....A.....C.....
Mluc_cont1.060466_101 .....A.....A.....A.....A.....TA.....A.....C.....
Mluc_cont1.020727_688 .....A.....A.....A.....T.....A.....A.....A.....T.....A.....
Mluc_cont1.215841_1303 .....T.A.A.....AGGAAC.....G.....C.....T.....C.....
Mluc_cont1.286269_519 .....T.C.....AA.....T.A.A.T.....A.....
Mluc_cont1.061271_2901 .....G.....T.....G.....A.....A.....G.....
Mluc_cont1.232421_7894 .....C.....T.....T.....T.....C.....
Mluc_cont1.288193_1284 .....G.....T.....T.....A.....C.....

310 320 330 340 350 360 370 380 390 400
nTc2_527_consensus -----ATAAATCCCGTAAGCGATTGCTTACTCTGCAAAATTC-AAATCGAATCTAATCAGCTATGCCAAAAGAGCATGGAAATAGAGCTCCAGAGACAAATT
Mluc_cont1.087472_2447 .....C.....T.....T.....A.....T.....C.....G.C.....
Mluc_cont1.111057_5805 .....A.A.C.....A.....A.....A.....A.....C.A.....A.....C.....
Mluc_cont1.018722_481 .....A.....A.....A.....T.....A.....A.....T.....T.....A.....
Mluc_cont1.060466_101 .....A.....A.....A.....A.....A.....C.....C.....C.....
Mluc_cont1.020727_688 .....A.....G.C.....C.....C.....C.....C.....G.....
Mluc_cont1.215841_1303 .....A.....T.....G.....G.....G.....C.....C.....C.....
Mluc_cont1.286269_519 .....C.....T.....T.....C.....C.....C.....C.....
Mluc_cont1.061271_2901 .....A.....A.....A.T.....A.....A.....C.C.....C.....
Mluc_cont1.232421_7894 .....A.....A.....A.....A.....C.....C.....C.....C.....
Mluc_cont1.288193_1284 .....A.....A.....A.....A.....C.....C.....C.....C.....

410 420 430 440 450 460 470 480 490 500
nTc2_527_consensus -----GGACCTCCCTCCACTGACTGTATGATCAGACAGTGGAG-AAAACA-GGAGAACCACTCCTTAAGATGCC--AAAAAGAGAGAA-GGCCITTAAG-AGGA
Mluc_cont1.087472_2447 .....T.....T.....T.....T.....T.....T.....T.....T.....T.....
Mluc_cont1.111057_5805 .....A.....A.....A.....A.....A.....A.....A.....A.....A.....
Mluc_cont1.018722_481 .....T.....T.....T.....T.....T.....T.....T.....T.....T.....
Mluc_cont1.060466_101 .....C.....C.....C.....C.....C.....C.....C.....C.....C.....
Mluc_cont1.020727_688 .....C.....A.....G.....G.....T.....A.....T.....A.....A.....A.....
Mluc_cont1.215841_1303 .....A.....A.....A.....A.....A.....A.....A.....A.....A.....
Mluc_cont1.286269_519 .....C.....C.....C.....C.....C.....C.....C.....C.....C.....
Mluc_cont1.061271_2901 .....G.....G.....G.....G.....G.....G.....G.....G.....G.....
Mluc_cont1.232421_7894 .....A.....A.....A.....A.....A.....A.....A.....A.....A.....
Mluc_cont1.288193_1284 .....G.....C.....G.....G.....G.....G.....G.....G.....G.....

510 520 530 540 550 560 570 580 590 600
nTc2_527_consensus -----AAACCAGCAAATGTTTAAAA-TATTGATTTCTTAATTT-TGGGTTGGAAAAGTGGGGC-CCT---CTTATACAGC--GAAAAATACCG]-----
Mluc_cont1.087472_2447 .....GG.....C.....C.....A.....A.....A.....A.....A.....T.....T.....TA.TAATTGTA
Mluc_cont1.111057_5805 .....C.....G.T.....-C.....-A.....-T.....-A.....-T.....T.....T.....TA.TAATGGAA
Mluc_cont1.018722_481 .....C.....C.....C.....G.....G.....G.....G.....G.....TACAGT.C.G.C.C.CAAGCTCAG
Mluc_cont1.060466_101 .....T.....T.....T.....T.....T.....G.....A.....G.....GCC.....G.....T.....G.....C.....GA.TAAGCTTG
Mluc_cont1.020727_688 .....C.....C.....C.....C.....C.....C.....C.....C.....A.....A.....A.....A.....TA.TAATTGTA
Mluc_cont1.215841_1303 .....C.....C.....C.....C.....C.....C.....C.....C.....T.....GA.....T.....TAATAAAA
Mluc_cont1.286269_519 .....AT.....A.....A.....A.....A.....A.....A.....A.....A.....T.....A.TACTCTATT
Mluc_cont1.061271_2901 .....C.....C.....C.....C.....C.....C.....C.....C.....T.....TACTTGGGT
Mluc_cont1.232421_7894 .....C.....C.....C.....C.....C.....C.....C.....C.....A.....A.....T.T.....G.....A.TAATATGTC
Mluc_cont1.288193_1284 .....T.....C.....A.....G.....T.....C.....C.....A.TAAGACCT

610
nTc2_527_consensus -----
Mluc_cont1.087472_2447 ATATATCTATT
Mluc_cont1.111057_5805 CCCCTCCCGACT
Mluc_cont1.018722_481 ACCTCTCCAGT
Mluc_cont1.060466_101 AGAATCTTACT
Mluc_cont1.020727_688 AACTGATTTT
Mluc_cont1.215841_1303 CACACACAC
Mluc_cont1.286269_519 CTCCTTTTAAA
Mluc_cont1.061271_2901 CTTACAAATGA
Mluc_cont1.232421_7894 ATTTGGGATTC
Mluc_cont1.288193_1284 CTGATACCTAC

```
